# Supplementary figures and images for: Distinct molecular profiles drive multifaceted characteristics of colorectal cancer metastatic seeds
Source: PubMed Central journal article supplement — J Exp Med. 2024 Mar 19;221(5):e20231359. doi: 10.1084/jem.20231359 (PMC10949939; doi:10.1084/jem.20231359), 2024-03-19

Figure4G

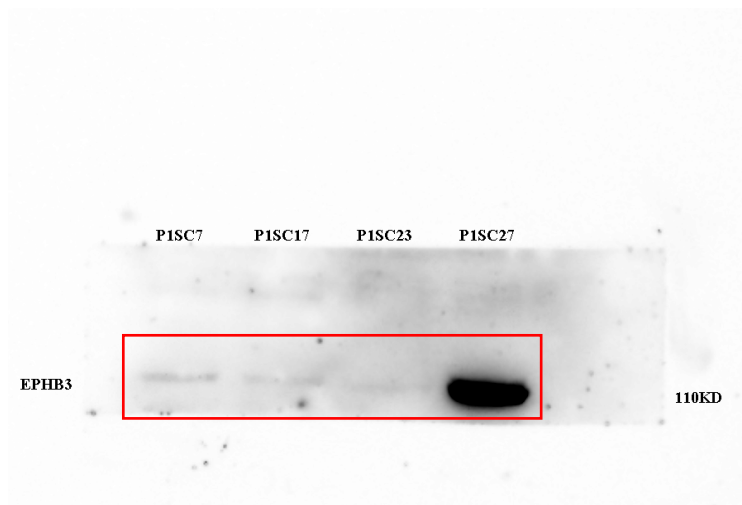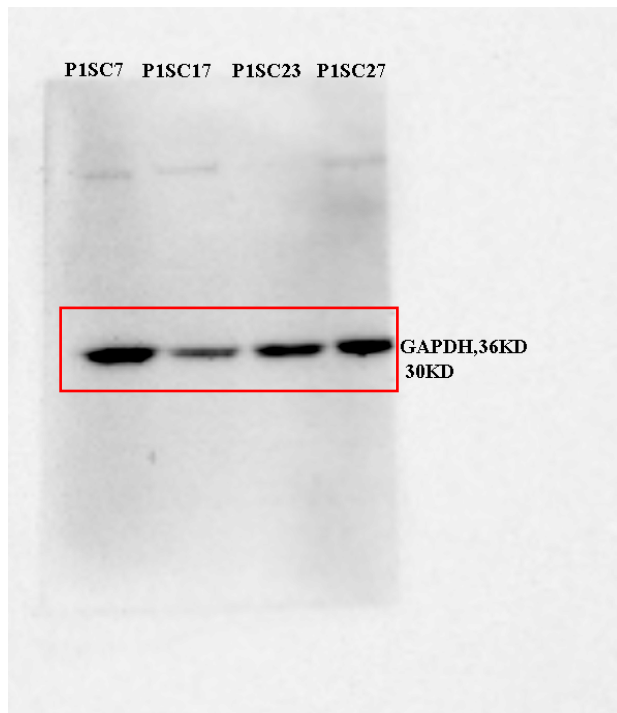

Supplement: JEM_20231359_SourceDataF4.pdf [file JEM_20231359_SourceDataF4.pdf]
